# Supplementary material
Source: PubMed Central journal article supplement (PMC4456190)
Supplement: NIHMS694971-supplement-legen.pdf [file NIHMS694971-supplement-legen.pdf]

## SUPPLEMENTAL FIGURE LEGENDS

**Fig S1 (A)** KMS18 and **(B)** INA6 cells were treated with PBS-1086 (0.5 and 5  $\mu$ M) for the indicated times (1 and 2 hours). NF- $\kappa$ B DNA binding activity in KMS18 nuclear extracts was measured by ELISA. NF- $\kappa$ B canonical activity included p65 (■), p50 (□), and c-Rel (▣); NF- $\kappa$ B non-canonical activity included p52 (■) and RelB (□). Treatment with TNF- $\alpha$  (10 ng/ml) for 1 hour served as a positive control of NF- $\kappa$ B activity for both time points, 1 and 2 hours. The results of ELISA are expressed as relative absorbance. Data represent mean  $\pm$  SD of three independent experiments.

**Fig S2** MM.1S cells were cultured with PBS-1086 (1  $\mu$ M) for the indicated times (2 to 8 hours). Cytoplasmic extracts were subjected to Western blotting using I $\kappa$ B $\alpha$ , P-I $\kappa$ B $\alpha$ , and GAPDH antibodies. GAPDH was used as a loading control for cytoplasmic extracts. Blots are representative of three independent experiments.

**Table S3** PBS-1086 with bortezomib triggers synergistic or additive cytotoxicity in bortezomib-resistant MM cells. Dox40 and ANBL-VR5 cells were treated with bortezomib and/or PBS-1086. Cytotoxicity was assessed by MTT assay. Combination indices (CI) were calculated using CompuSyn software. CI < 0.9 indicates synergistic effects. 0.9 < CI < 1.1 indicates additive effects.

**Fig S4 (A)** ANBL6-VR5 cells were cultured with PBS-1086 (0.15-40  $\mu$ M) and bortezomib (0.62-160 nM) for 24 (—◆—), 48 (- □-) and 72 hours (-▲-). Cell viability was assessed by MTT assay of triplicate cultures, expressed as percentage of untreated control. Data represent mean  $\pm$  SD viability. **(B)** Bortezomib-sensitive ANBL6-wt and bortezomib-resistant ANBL6-VR5 MM cell lines were treated for 48 hours with increasing concentrations of bortezomib (0.62-160 nM) and PBS-1086 (0.15-40  $\mu$ M). Cell viability was assessed by MTT assay of triplicate cultures. The IC<sub>50</sub> values of PBS-1086 and bortezomib for both cell lines were measured. The bar graph shows the IC<sub>50</sub> ratio (ANBL6-VR5/ANBL6-wt). Data represent mean  $\pm$  SD viability of three independent experiments.

**(C)** ANBL6-VR5 cells were cultured for 4 and 8 hours with PBS-1086 (1  $\mu$ M) in the presence or absence of bortezomib (Bort) (40 nM). Whole cell lysates were subjected to Western blotting using I $\kappa$ B $\alpha$ , P-I $\kappa$ B $\alpha$  (Ser 32/36), p38, and  $\alpha$ -Tubulin antibodies.  $\alpha$ -Tubulin was used as a loading control. Blots are representative of three independent experiments.

**(D)** The densitometric analysis of scanned immunoblotting images for I $\kappa$ B $\alpha$  (■) and P-I $\kappa$ B $\alpha$  (□) was performed with the NIH imageJ Software and expressed as fold change relative to non-treated cells.

**Fig S5** Cytoplasmic extracts from mature osteoclasts were cultured for 2 hours with PBS-1086 at 1 and 5  $\mu$ M. Control non-treated osteoclasts were stimulated with RANKL and M-CSF. Cytoplasmic extracts were subjected to Western blotting using JNK, ERK, and  $\alpha$ -Tubulin antibodies.  $\alpha$ -Tubulin was used as loading control, and blots are representative of three independent experiments.
